# Supplementary material for: Vascular Endothelial Growth Factor A (VEGFA) Regulates Hepatic Lipid and Glycogen Metabolism in Schizothorax prenanti
Source: MDPI journal article supplement (doi:10.3390/ijms242015171), 2023-10-14
Supplement: s1 [file s1]

**Table S1 Sequences of primers used in this study**

| <b>Primer names</b> | <b>Primer sequences (5'-3')</b> | <b>Tm (°C)</b> |
|---------------------|---------------------------------|----------------|
| VEGFA-F             | AGCCAAAGACTCGCCACAAC            | 54.2           |
| VEGFA-R             | TGGGCAGGACAATGAATGAAGG          |                |
| VEGFA-F (BamHI)     | CGCGGATCCATGTCGTCAGATGTCACCAA   | 57             |
| VEGFA-R (HindIII)   | CCCAAGCTTGTCTTTGTGCAAAGTCT      |                |
| GK-F                | AGAGGAAGTGATGAGGAGAA            | 57             |
| GK-R                | GTGGAGCGGACATAAGTG              |                |
| PK-F                | GCACTCATACAACAGCCTTAGC          | 57             |
| PK-R                | TCCTGGAGCATCTGTGTCTG            |                |
| G6Pase-F            | CCTGAAGGCTCTCGGTGTGGAT          | 57             |
| G6Pase-R            | ACTTGCGAACGGTGTGGTGTC           |                |
| FBPase-F            | AGATGGCAGTTCACCTTATGGA          | 57             |
| FBPase-R            | GCACTCATACAACAGCCTTAGC          |                |
| PEPCK-F             | TGTCCTTCGGCAGCGGTTAC            | 55.7           |
| PEPCK-R             | CAGCCAACCAGCCTTCGTCTT           |                |
| GYS2-F              | CAGAGGAACCGAACAGAGCG            | 59.9           |
| GYS2-R              | TGAGGAGATGAGTGAAGCGAGTG         |                |
| FAS-F               | CAGTAGTGTATGCCACCGCA            | 59             |
| FAS-R               | TGCAATAGCAATAGCGGCCT            |                |
| ACC-F               | GGGCACAAAGACCGACAGAT            | 55             |
| ACC-R               | GCCTGGCGAAACATTTCTGG            |                |
| SCD1-F              | TGTGCTGCTGATGTGCTT              | 59.4           |
| SCD1-R              | GATGTTGCCGTCATAGGG              |                |
| LPL-F               | ATGGACGGTCACGGGTAT              | 59             |
| LPL-R               | TTTGGTGTAGGCGGCAGA              |                |
| CPTIA-F             | TGAGTGATTGGTGGGAGG              | 59             |
| CPTIA-R             | GCATGGCATGGACTACGT              |                |
| ATGL-F              | CTGGGTATTTATCACATCGG            | 59             |
| ATGL-R              | GCTTCTTTAGCCACGTCAA             |                |
| GAPDH-F             | TGACCCGTGCTGCTTTC               | 55             |
| GAPDH-R             | GCCTTAACCTCACCTTGT              |                |
| $\beta$ -actin-F    | TTCTTGGGTATGGAGTCTTG            | 59             |
| $\beta$ -actin-R    | AGGTCCTTACGGATGTCTG             |                |
